1 Jan Euteneuer<sup>1</sup>, Annica Gosch<sup>1</sup>, Cornelius Courts<sup>1</sup>

2  
3 **Nothing but hot air? – On the molecular ballistic analysis of backspatter generated by and the**  
4 **hazard potential of blank guns**

5  
6 <sup>1</sup>Institute of Forensic Medicine, University Medical Center Schleswig-Holstein, Kiel, Germany

7  
8  
9 **Corresponding author:**

10 PD Dr. Cornelius Courts

11 Mail: [cornelius.courts@uksh.de](mailto:cornelius.courts@uksh.de)

12 Tel: +49 431 500 15922

13  
14 **ORCID of the authors**

15 Jan Euteneuer: 0000-0001-7800-3509

16 Annica Gosch: 0000-0002-3315-7587

17 Cornelius Courts: 0000-0002-9811-8482

18  
19  
20 **Abstract**

21 Blank cartridge guns are prevalent especially in countries with laws restricting access to conventional  
22 firearms and it is a common misconception that these weapons are harmless and only used as toys or  
23 for intimidation. However, although their harming potential is well documented by numerous reports  
24 of accidents, suicides, and homicides, a systematic molecular biological investigation of traces  
25 generated by shots from blank cartridges at biological targets has not been done so far.

26 Herein, we investigate the occurrence and analyzability of backspatter generated by shots of  
27 different types of blank cartridge guns firing different types of blank ammunition at ballistic gelatin  
28 model cubes doped with human blood and radiological contrast agent soaked into a spongy  
29 matrix and covered with three different variants of skin simulants.

30 All skin simulants were penetrated and backspatter was created in 100% of the shots in amounts  
31 sufficient for forensic STR typing that resulted in correct identification of the respective blood donor.  
32 Visible backspatter was documented on the muzzle and/or inside the barrel in all cases, and in 75%  
33 of cases also on the outer surfaces and on the shooter's hand(s). Wound cavities were measured and  
34 ranged between 1 and 4.5 cm in depth.

35 Discussing our findings, we provide recommendations for finding, recovering and analyzing trace  
36 material from blank guns; and presenting a comprehensive overview of the pertinent literature on  
37 injuries inflicted by blank guns we emphasize the considerable hazard potential of these devices.

## 38 **Keywords**

39 molecular ballistics; backspatter; ballistic model; blank cartridge guns, blank guns, wound channel  
40

## 41 **Declarations**

### 42 **Funding**

43 This project was funded by the Deutsche Forschungsgemeinschaft (DFG) (CO 992/7-1).  
44

### 45 **Conflict of interest**

46 The authors declare that they have no conflict of interest.  
47

### 48 **Ethics approval**

49 This study was performed in line with the principles of the Declaration of Helsinki. The study design  
50 and experimental procedures were approved by the ethics committees of the University Hospital of  
51 Bonn and the University Medical Center of Schleswig-Holstein.  
52

### 53 **Availability of data and material**

54 Raw and additional data are available upon request.  
55

### 56 **Code availability**

57 Not applicable.  
58

## 59 **Acknowledgements**

60 We, again, are very grateful to the Landeskriminalamt Schleswig-Holstein for facilitating and friendly  
61 help with the shooting session on their premises. Special thanks go to Jan “Punk's not dead” Rohwer  
62 for providing us with high quality blood samples and to Franziskarr “Risikobegegnung” Siefer for her  
63 help during shooting sessions. We also thank Phil Cachée (Sachverständigenbüro Cachée, Berlin,  
64 Germany) for providing us with shocking chicken footage. The expert technical assistance of Kathi  
65 “liieh, baaah!” Pöhls is also gratefully acknowledged. Finally, we thank the Deutsche  
66 Forschungsgemeinschaft (DFG) for funding this project (CO 992/7-1).

67

## 68 Introduction

69

70 Gun ownership is widespread around the world and incidents of gunshot related injuries and deaths  
71 are well documented [1] and in some countries so prevalent that gun violence had to be declared as  
72 a “public health crisis” [2]. Blank cartridge guns, or blank firing guns, on the other hand, and due to  
73 the lack of a projectile, are regarded by many as less hazardous to be used as toys or non-lethal  
74 devices for self-defense. Hence, they are freely available in many countries for adults and can be  
75 purchased without any need for registration, and with no proper regulation in place. They are most  
76 prevalent in countries where access to conventional firearms is limited and regulations for gun  
77 ownership and gun use are restrictive. Example for this are Turkey, where blank guns are cheap and  
78 blank gun-related fatalities common (e.g. [3]), and Germany, where in 2020 the police union (GdP,  
79 “Gewerkschaft der Polizei”) estimated that about 15 million blank cartridge guns are circulating in  
80 the public. This is nearly three times the number of weapons and weapon parts registered at the  
81 German national weapon register (NWR, “Nationales Waffenregister”) [4]. Meanwhile the number of  
82 “small gun licenses”, which are required to carry a blank gun in public, is about 670,000, thus  
83 representing only 4.5% of the estimated blank guns owned in Germany [4].

84 These numbers indicate the need for and relevance of ballistic research on blank cartridge guns and  
85 ammunition and their hazard potential. However, although numerous case reports are available,  
86 experimental studies focusing on blank guns are limited. Apparently, their ability to severely injure or  
87 even kill is highly underrated, even though comments on their potential hazard including warnings  
88 against misuse had been published as far back as 1865 [5]. About one hundred years later, more case  
89 reports began to emerge and Shepard among others reported incidents involving wounds caused by  
90 blank cartridges and corroborated the warnings issued before, calling the designation “blank” a  
91 “misnomer” [6]. Tausch et al. also demonstrated the danger posed by blank ammunition to human  
92 bodies and advocated for stricter legal regulations in Germany already in 1974 [7]. More recent  
93 studies employing ballistic gelatin models with focus on wound morphology were published for  
94 instance by Schyma & Schyma [8] and Pircher et al. [9]. However, systematic research involving  
95 molecular ballistic analyses of biological traces created by blank cartridge gun shots at biological  
96 targets has not been performed so far with the exception of a single study analyzing traces of  
97 backspatter inside 20 guns after fatal contact shots to the head, that included a .380 revolver  
98 described as a blank cartridge gun from which sufficient trace material for STR typing could be  
99 retrieved [10]. Therefore, more research is necessary, as, given that lack of a projectile, regular  
100 ballistic knowledge is transferable only to a limited degree to blank cartridge gunshot phenomena.

101 In this study, we apply “molecular ballistics” (the molecular biological analysis of biological traces  
102 originating from gunshots at biological targets) to blank cartridge gunshots using different types of  
103 weapons and ammunition at variations of ballistic gelatin models with skin simulant, simulating a  
104 torso. From the results we intend to infer the DNA profile of “the victim” and assess the deposition of  
105 trace material. For this purpose, we aim to investigate whether ‘backspatter’ [11], the biological  
106 material which is propelled from the entrance wound back towards the shooter and which has been  
107 shown to persist inside of firearms [12], is reliably created by guns emitting only a gas jet without a  
108 projectile. The generation of backspatter by conventional firearms has been known for a long time  
109 [13] and its molecular ballistic analyzability has been proven not only in real cases e.g. of multiple  
110 homicide [14], but also experimentally [15, 16]. In the present study, we are first to evaluate the  
111 possibility of STR profiling from backspatter traces generated by blank cartridge gunshots. We  
112 consider difficulties of handling and offer recommendations for finding and sampling biological traces  
113 from blank cartridge guns. Also, we evaluate the hazard potential of blank guns based on wound  
114 channel analysis and by discussing the literature and anecdotal evidence pertaining to the  
115 destructive potential of a blank cartridge gas jet.

116

## 117 Materials and Methods

118

### 119 Blood collection and sample mixtures

120 The venous blood employed in the sample mixtures was drawn by venipuncture and collected in  
121 sterile K3 EDTA S-Monovettes® (Sarstedt, Germany). It was donated by two informed and consenting  
122 adult volunteers, neither of whom were involved in the loading or shooting process at the shooting  
123 site, nor sample collection, nor weapon cleaning. EDTA blood of each donor was mixed with the CT-  
124 contrast agent Barilux® (Sanochemia Diagnostics, Germany) in a ratio of 1:1 to obtain a “double-  
125 contrast” mixture as described recently [15], representing a modification of a previously established  
126 multi-component contrast mixture [16].

### 127 Preparation of the ballistic models

128 The ballistic models used in this study were intended to roughly emulate a human torso. Hence, they  
129 were based on the “reference cube” introduced by Schyma et al. [17] and were constructed as three  
130 slightly different variants: (1) A single layer of chamois leather of 10 cm x 10 cm was glued onto the  
131 bottom of a polypropylene box, on top of which a spongy matrix, soaked with about 20 mL of  
132 “double-contrast” mix and tightly wrapped in cling film, was glued as well; (2) the same set-up as in  
133 (1) but with two layers of chamois leather glued together; and (3) a single layer of chamois leather,

134 but with the wrapped “double-contrast” sponge additionally sealed into an evacuated vacuum bag.  
135 These variants were chosen to represent possible physiological variation of differences in skin  
136 thickness [18] and mechanical properties [19] between individuals and different locations on the  
137 torso. Chamois Leather with a thickness of about 1-2 mm was chosen as a skin simulant following a  
138 recommendation for ballistic test shootings by a ballistics expert of the German Federal Criminal  
139 Police Office (personal communication).

140 The polypropylene boxes were then filled with type III ballistic gelatin (Honeywell Fluka™, Germany)  
141 prepared at a 10% concentration following Fackler’s instructions [20] and were subsequently stored  
142 for about 36 hours at 4 °C. Prior to shooting, the gelatin block was taken out of the box (the leather  
143 would stick to the gelatin and peel from the bottom despite the glue) and cut into blocks of about  
144 12 cm x 14 cm x 11 cm.

145

## 146 [Experimental shooting setup](#)

147 The experimental shooting was conducted at the designated shooting area on the premises of the  
148 State Office of Criminal Investigation of Schleswig-Holstein (LKA-SH) in Kiel. The gelatin blocks were  
149 placed upon a table onto a stiff base of foam rubber padding, to enable proper gelatin expansion  
150 without giving too much leeway for movement [21]. All shots were contact shots aiming at the center  
151 of the leather skin simulant that were executed by one of the authors freehand and without  
152 mechanical stabilization of the weapon to simulate realistic shooting conditions. To avoid  
153 contamination by the shooter, forensic-grade protective gear used in the Institute of Forensic  
154 Medicine Kiel, Germany, Standard Earloop Facemasks (3M Health Care, Germany) and Micro-Touch®  
155 nitrile examination gloves (Ansell, Belgium) were worn when and changed before each shooting.

156 Two currently freely available and commonly encountered 9 mm blank cartridge guns were used in  
157 this study: one pistol (Ekol Firat Compact, Voltran Silah Sana, Turkey) and one revolver (Zoraki R1  
158 2.5”, ATAK Arms Industry, Turkey). In addition, one 8 mm blank pistol (Reck Commander 8 mm,  
159 UMAREX GmbH, Germany), which is not sold anymore but still common as a collector’s item, was  
160 retrieved from the stock of the LKA-SH. The weapons and different kinds of ammunition employed  
161 herein are listed in Table 1, including one black powder and one non C.I.P.<sup>1</sup> -listed ammunition.

162 After each shot, the gelatin blocks were wrapped in plastic foil and transferred back into the plastic  
163 boxes for further evaluation.

---

<sup>1</sup> C.I.P.: Commission internationale permanente pour l'épreuve des armes à feu portatives, engl. “*Permanent International Commission for the Proof of Small Arms*”

## 164 Trace documentation, sampling, and weapon cleaning

165 To obtain an impression of the respective backspatter distribution, the weapons, as well as the hands  
166 of the shooter and any additional noticeable traces were photographed after each shot.

167 Sampling was conducted using DNA-free forensic nylon swabs (4N6 FLOQ Swabs Genetics, Copan  
168 Flock Technologies, Italy) and by applying a modified double swab technique [22], where a single  
169 swab is moistened on one half with 20 µL HPLC gradient grade water (Th. Geyer GmbH & Co. KG,  
170 Germany), while the other half remains dry. Backspatter samples were collected from distinct  
171 sampling locations termed A – D (in cases without visible traces, the entire location was swabbed):  
172 the outer frame / slide of the weapon (A), the muzzle and surrounding frame at the front (B), and the  
173 outer surfaces of the barrel, which is exposed by pulling back the slide (C, pistols only). Swabbing the  
174 inside of the barrel (D) cannot be properly conducted using the above mentioned standard forensic  
175 nylon swabs as it is hindered by the blockage attached within the barrel of commercially available  
176 blank guns; hence, in this study, thin stripes of medical cellulose were inserted into the barrel and  
177 shoved past the blockage as far as possible with the help of a pipette tip to collect any traces of  
178 backspatter (see Supp. Fig. 1 E, 6 B). The cellulose stripes had been treated with UV light for 24 hours  
179 prior to the shooting and had been experimentally tested to be free of amplifiable human DNA.  
180 Afterwards the pistols were disassembled (the revolver had no detachable pieces), and the parts  
181 examined for further traces.

182 Prior to each shot after sampling and documentation, all surfaces were thoroughly cleaned  
183 mechanically with Kimtech Science Precision Wipes (Kimberly-Clark, USA) and chemically using Roti®-  
184 Nucleic Acid-free (Carl Roth GmbH, Germany) and distilled water. The inside of the barrel was rinsed  
185 along the blockage with both liquids and scrubbed with Roti®-Nucleic Acid-free-soaked pipe cleaners.  
186 The weapons were then reassembled and subsequently blow-dried by the shooter with compressed  
187 air. Finally, and immediately before the next shot, negative controls were taken from all sampling  
188 locations of the weapon.

189

## 190 DNA extraction, quantification and STR profiling

191 DNA extraction from all samples was performed using the PrepFiler® Forensic DNA Extraction Kit  
192 (Thermo Fisher Scientific, USA) according to the manufacturer's recommendations, with the  
193 exception of additionally employing NucleoSpin Forensic Filters (Macherey-Nagel, Germany) in the  
194 lysis step, yielding an elution volume of 50 µL.

195 The DNA concentration was determined by quantitative PCR (qPCR) using the PowerQuant® system  
196 (Promega, Wisconsin, USA) on an Applied Biosystems™ 7500 fast Realtime PCR System (Thermo

197 Fisher Scientific). Quantification was performed in duplicates following the manufacturer's  
198 instructions, but as a modified approach with 2 µL DNA sample in a reduced reaction volume of  
199 10 µL. This approach had been validated and accredited for routine analysis in our laboratory. DNA  
200 degradation and PCR inhibition values, as put out by the PowerQuant® analysis tool, were analyzed  
201 as well to evaluate the DNA quality from samples created with different blank ammunitions and  
202 taken from different sampling locations.

203 For one sample from each backspatter event and for negative samples exhibiting an amount of  
204 quantifiable autosomal DNA above 0.4 pg/µL (lab-internally validated threshold below which no  
205 relevant amplification of human STR alleles is to be expected), STR multiplex-PCR was performed to  
206 investigate possible contaminations using the NGM Detect™ PCR Amplification Kit (Thermo Fisher  
207 Scientific) according to the manufacturer's protocol on an Applied Biosystems™ GeneAmp PCR  
208 System 9700 (Thermo Fisher Scientific) and with an optimal input amount of 0.5 ng DNA, if possible.  
209 PCR products were separated and detected on an Applied Biosystems™ 3500 Genetic Analyzer  
210 (Thermo Fisher Scientific) Data was analysed with the GeneMapper ID-X software version 1.5  
211 (Thermo Fisher Scientific) and mixed profiles evaluated with the LRmix Studio software version 2.1.5  
212 [23, 24].

213

## 214 Ballistic Model and wound channel evaluation

215 The gelatin cube models were photographed, and the extent of the entrance "wound" on the leather  
216 skin simulant documented. Afterwards the wound channel was dissected from the gelatin block and  
217 serially cut to about 0.5 cm thick slices. A scanner (MP C306, Ricoh, Canada) was used to create  
218 images of the slices (600 dpi). Those images were further evaluated with ImageJ 1.52d (NIH, USA),  
219 first qualitatively, and second, where possible, quantitatively by applying the polygon method [25,  
220 26], where the end of the tears of the wound cavity are connected, creating a polygon whose  
221 circumference reflects the extent of the damage inflicted by the gas jet on the gelatin.

222

## 223 Literature research

224 A thorough and comprehensive browsing of available research literature in German and English was  
225 conducted to identify forensically relevant studies, reviews and case reports concerning blank firing  
226 guns and ammunition. Articles of interest were identified using the Pubmed.gov (U.S. National  
227 Library of Medicine) search engine with search terms as "blank guns AND ballistics", "blank guns AND  
228 forensic" etc., as well as by perusing further references listed in these publications. Articles with  
229 purely medical focus on treatment were excluded, as well as articles which were referenced in

230 publications, but could not be found and validated online. The collection can be found in Supp.  
231 Table 2 and is presented as a sortable Excel table.

232

## 233 Results and discussion

234

### 235 General appearance of backspatter

236

237 The goal of this study was to systematically assess whether backspatter in forensically relevant  
238 amounts is generated in a reproducible manner by shots from and propelled back onto and into  
239 blank guns. To this aim, we employed different kinds and types of weapons and ammunitions as well  
240 as ballistic models with three variants of skin simulant.

241 We demonstrated that backspatter traces containing DNA of sufficient amount and quality for STR  
242 profiling could be detected on the inner and/or outer surfaces of every weapon following each shot  
243 that penetrated through the contrast mixture bag into the gelatin block (examples shown in Fig. 1).  
244 All but one shot penetrated the respective skin simulant, the exception being one shot from the  
245 revolver firing “Walther 9 mm R.K.” ammunition at a double layer of skin simulant. This is proof that  
246 the gas jet alone as produced by blank guns is sufficient to reproducibly create the energy and cause  
247 the correspondent wound ballistic effects (e.g. a temporal wound cavity) that are required for  
248 backspatter generation. Additionally, the shooter’s hand demonstrated visible traces of backspatter  
249 after 75% of the shots (Table 2, Fig. 1 I), and after 33% of shots, different amounts of backspatter  
250 were found on the PPE, goggles and/or face mask of the shooter (Table 2, Supp. Fig. 5 D).

251

### 252 Distribution of backspatter traces and molecular ballistic analysis

253

254 A summary of the results is presented in Table 2. Sampling was performed in a non-quantitative  
255 manner (as no replicates of weapon-ammunition-model combinations were performed), i.e. in cases  
256 where extensive amounts of backspatter occurred, only one sample swab was taken. Otherwise, the  
257 entire sampling location was swabbed. The major part of backspatter generated by contact shots was  
258 expected to consolidate at and around the muzzle (sampling location B) and inside the barrel  
259 (sampling location D). Indeed, visible traces at the muzzle could be detected after 100% of the shots  
260 (Fig 1 A-C, Supp. Fig. 1-12) and all corresponding swab samples yielded DNA concentrations sufficient  
261 to perform STR profiling (between 9.2 pg/μL and 1.6 ng/μL). Traces within the barrel could not as



262 easily be detected however, as the barrel blockage stretches through nearly the entire barrel short of  
263 a few millimeters of the muzzle, rendering photo documentation difficult (e.g. Supp Fug. 7 B – 9 B),  
264 even with the use of additional lamps. Despite these difficulties, backspatter inside the barrel was  
265 detectable by visual inspection in 75% of the shots. Endoscopic examination, even though an  
266 endoscope could not be completely inserted into the barrel of a blank gun, nevertheless might be of  
267 help to detect possible traces, as it does with regular handguns [27], by providing an illuminated  
268 camera view from the muzzle inside the barrel with adjustable zoom and viewing angle. Our method  
269 of inserting cellulose stripes into the barrel (Supp. Fig. 1 E, 6 B) proved to be cumbersome but  
270 effective for collecting sufficient backspattered material from 100% of the shots. DNA from the  
271 stripes could be readily extracted applying a standard procedure with concentrations ranging  
272 between 6.6 pg/ $\mu$ L and 4.5 ng/ $\mu$ L. In cases when traces are hardly or not visible at all, however,  
273 alternative sampling techniques may be appropriate, as the stripes cannot be shoved through the  
274 entire length of the barrels. Barrel blockages come in different shapes and sizes depending on the  
275 gun's type, model and manufacturer, and the sampling technique needs to be adapted to the  
276 weapon at hand. In any case, the space between blockage and inner surface of the barrel will not be  
277 wider than a few millimeters (see e.g. Fig. 1 C), too narrow to fit in neither standard forensic swabs  
278 nor even the finest swabs available to us (4N6FLOQ Crime Scene Divisible Swabs (Copan)). Future  
279 studies could assess medical swabs with mini tips for their applicability, e.g. pediatric, urethral, or  
280 specimen collection swabs like the "FLOQSwabs Sterile Ultra Thin Minitip" (Copan) or the "Sterile  
281 Mini-tip Rayon/Polyester Swabs" (Puritan, USA), both with ca. 2 mm tip diameter. However, an  
282 alternative or additional approach to collect biological material from inside the barrel could be to  
283 carefully rinse the barrel with water or buffer and collect the flowthrough. When cleaning the  
284 weapons after each shot, we observed that a considerable amount of our "double-contrast" mixture  
285 persisted inside the barrel and could be washed out (Fig. 1 G). Such an approach could be tested with  
286 dried samples and anticoagulant-free blood in future work.

287 Backspatter on the frame, the outer surface of the slide and other exterior parts (sampling location  
288 A) was documented after 75% of shots (Table 2). Three cases were free of visible traces, and  
289 quantification of the DNA extracted from samples recovered from these locations resulted in  
290 concentrations of 0.1, 0.3 and 0.5 pg/ $\mu$ L, i.e. slightly below or above our lab-internal threshold of  
291 0.4 pg/ $\mu$ L for successful STR profiling (Table 2). Still, all three weapons bore clearly visible and  
292 analyzable backspatter traces inside the barrel and at the muzzle, respectively. Lacking high-speed  
293 recordings of the process, possible explanations for the variability in trace distribution are  
294 speculative but include twitching of the shooter's hand, variation of extent and pattern of the  
295 rupture of the leather skin simulant at the entry site, chaotic distribution of the muzzle gas inside and

296 between the model components (“double-contrast”-bag, gelatin and skin simulant), as well as  
297 variations of the combustion of the propellant, and any combination of those.

298 In criminal cases, the standard procedure for trace recovery from a gun should require its complete  
299 disassembly and sampling of inner surfaces [14]. With blank firing guns mostly built up of few easily  
300 detachable pieces, this can be done accordingly. While the revolver in this study had no detachable  
301 parts, both pistol models did, yet the smaller parts, e.g. the recoil spring, did hardly bear any visible  
302 traces in our sample set (only found after one pistol shot, see Supp. Fig. 5 E), unlike as had been  
303 described in previous work with regular hand guns [15]. The exception from this was the inner  
304 surface of the detachable slide (Fig. 1 J), which together with the outer surface of the barrel was  
305 subsumed as sampling location C. Sampling those areas yielded DNA concentrations above 0.4 pg/μL  
306 in 85% of cases, with a maximum of 666.6 pg/μL.

307 Due to the generally large amounts of recoverable backspatter, DNA profiling was straightforward  
308 and resulted in full STR profiles that correctly identified the respective blood donor i.e. the simulated  
309 victim in 100% of the samples. Only one profile exhibited three additional minor drop-in alleles, yet  
310 all below 2.5% average peak height.

311

### 312 Evaluation of negative controls

313 After each shot, firearms were thoroughly cleaned to remove remaining traces from previous shots.  
314 Out of 42 negative controls, however, 12 (29%) yielded DNA concentrations above 0.4 pg/μL,  
315 between 1 and 48.5 pg/μL (Supp. Table 1). Of those, 10 originated either from sampling location B or  
316 D, i.e. the muzzle area and inside the barrel, where most of the backspatter was detected and  
317 effective cleaning had proven to be most difficult due to the barrel blockage. In 7 of 12 cases, STR  
318 profiling identified the respective blood donor of the previous shot, indicating that even our  
319 thorough and extensive cleaning procedure was insufficient. While this, on the one hand,  
320 demonstrates the need to optimize DNA removal when cleaning blank guns, it portends, on the other  
321 hand, an opportunity in real cases to retrieve traces from inside the barrel even from guns that had  
322 been thoroughly cleaned. In 3 of 12 cases, a mixed profile of two donors with distinct major and  
323 minor components were found: in one sample, this was most likely due to contamination, as the  
324 minor contributor (all peaks <15% average peak height) had performed the DNA extraction. The  
325 other two samples originated from the same shot; there, the minor contributor was the blood donor  
326 for the model that had been shot before with the very same weapon. Therefore, minimal traces  
327 appeared to have remained inside the weapon even after two rounds of extensive cleaning, although  
328 cross contamination during the sample processing cannot be excluded as well. As no contamination  
329 was detected at the regular samples collected after the shot, the large amounts of backspatter seem

330 to have 'quenched' or masked the minuscule remains of that respective donor. From the last 2 of 12  
331 negative controls, one was a mixed profile with small peaks not clearly attributable to any donor or  
332 involved person, and the other represented the STR profile of the shooter, probably due to a  
333 contamination while air-drying the weapon after cleaning. There were, however, no STR signals  
334 attributable to the shooter found in the following or any subsequent shot from this weapon.

335

### 336 Recommendations for the sampling of blank firing guns

337 Taking together the findings described so far, it can be constituted that contact shots delivered by  
338 different types of blank guns firing different kinds of ammunition at different types of ballistic models  
339 reproducibly generate sufficient amounts of backspatter to allow for molecular ballistic analysis. This  
340 observation will highly likely hold true also for real biological targets. It therefore needs to be  
341 discussed, where exactly to find and how to collect such traces, especially considering the structure  
342 of the barrel.

343 As seen in our samples, a variety of locations can be reached by the backspatter traces, thus, as with  
344 real handguns, the entire weapon should be examined carefully, and all parts disassembled if  
345 possible. Sampling should be performed starting with the outside parts (beginning with visible traces  
346 on the frame, trigger guard and so on) followed by the inside parts. The muzzle is the most obvious  
347 outside part for backspatter to be recovered from. If the gun is cleaned and free of visible traces, all  
348 parts, especially inner surfaces of detachable parts or the outer surface of the barrel, should still be  
349 examined and sampled as well. Pooling of samples will in general increase the chance of recovering  
350 sufficient material for DNA analysis [10]. Finally, the barrel's inside as a prominent source of  
351 backspatter that is well shielded against the environment, should be sampled using techniques and  
352 tools that are matched to the structure of the barrel blockage. The technique applied herein using  
353 cotton stripes may be appropriate, but can certainly be adapted, improved, and optimized. One  
354 approach, especially with cleaned guns, could be to rinse the barrel directly with lysis buffer for DNA  
355 extraction and pool the flow-through with sampled material on cotton stripes for a combined lysis  
356 step. In our hands, cleaning the barrel even with chemicals specifically dedicated to DNA removal,  
357 was not always sufficient to remove all remains, which may be exploited for evidence collection in  
358 real cases.

### 359 Evaluation of the hazard potential of blank guns

360

#### 361 Examination of the entrance wound and wound cavity

362 The contrast mixture used in this study comprised venous blood and an X-ray contrast agent to  
363 facilitate radiological wound channel evaluation via CT analysis as described before [15, 28].

364 However, the wound channels produced by the blank gun shots proved to be small and mostly filled  
365 with gunshot residues (GSR), barring meaningful results from CT analysis which was hence discarded.  
366 Alternatively, the extent of the destruction in the gelatin was quantified applying the polygon  
367 method to the analysis of 0.5 cm cut slices and add the resulting values to a sum representing the  
368 total damage (Table 2). Alternative methods based on crack length were considered, but as the  
369 wound channel frequently did not exhibit a clear center lacking a proper bullet path, the  
370 measurement of crack lengths would have been inaccurate.

371 Little data is available on the range of energy transfer of blank cartridge ammunition. Still, it  
372 appeared plausible to expect that the depth of the cavity would in our experimental setup depend on  
373 the thickness of the skin simulant when shot with the same blank gun and ammunition, while its  
374 appearance (shape and position) would be attributable to the kind of ammunition, albeit with  
375 considerable variation, as seen in previous studies using gelatin e.g. by Schyma et al. and Pircher et  
376 al. [8, 9]. Despite employing a different model setup, wound morphologies and depths were  
377 comparable to these studies. An expectable correlation of wound depth and skin simulant thickness  
378 could not be confirmed with our sample number though (all depths of the wound channels listed in  
379 Table 2). Representative examples of and all wound cavity morphologies are displayed in Fig.2, and  
380 Supp. Fig. 14, respectively. Their shape was essentially tubular or conical, with varying width and  
381 distinct blackening from the GSR in all cases. In two cases, both produced with the revolver firing  
382 “Walther 9 mm R.K.” ammunition, the wound cavity was not sufficiently deep to be cut out or was  
383 even nondetectable at all. Given that the “double-contrast” mix bag had been penetrated and  
384 backspatter had indeed been created, a minimum gas jet length of 1 cm may be deduced, roughly  
385 equaling the combined thickness of skin simulant and bag. The maximal length of a cavity in our  
386 study resulted from a shot with black powder ammunition with about 4.5 cm, hence as well matching  
387 the above mentioned findings of Schyma et al. and Pircher et al., but also substantiating a  
388 considerable wounding potential when inflicted to real biological targets i.e. living organisms. A  
389 notable difference was observed when comparing ammunition based on nitrocellulose and black  
390 powder employed in two shots: In addition to the greater depth and more pronounced gelatin  
391 destruction as inferred by the polygon perimeter values, black powder ammunition also produced a  
392 distinct yellow and grey shaped ring around the wound cavity and discoloration throughout the  
393 entire cavities. This phenomenon had not been described in the literature before, but we suggest  
394 that this may be an effect of a chemical or thermal reaction between the burning black powder and  
395 the gelatin.

396 At every block, the skin simulant was slightly ballooning convexly towards the outside due to the  
397 backspattered gas (best seen at Supp. Fig. 14 F & H). The gas jet entry sites were lacerated by

398 multiple, mostly 3 to 4 tears (Fig 1 D-E), which rather resembled blank cartridge gunshots to the  
399 head, e.g. as shown in [29]. The wounds were accompanied by, albeit small, substance losses of the  
400 skin simulant in 75% of cases, while in the remaining cases (two with double layers of chamois  
401 leather and one with vacuum bag) the ‘wounds edges’ of the skin simulant were perfectly adaptable  
402 (Supp. Fig. 13). This is in contrast to the findings of Pircher et al. [9], who reported roundish skin  
403 defects produced by their experimental shots at their pig skin-gelatin model. The different  
404 characteristics of chamois leather regarding tensile strength [30] as well as the “double-contrast”  
405 mixture bag being positioned underneath the skin simulant, thus offering a softer space for the  
406 leather to spread into, might be a possible explanation for this.

407

#### 408 Further examples and observations of the damage potential from blank guns

409 The harming potential has been illustrated not only by our experiments or the referenced studies,  
410 but by numerous reported incidents of accidents, homicides, suicides and further experiments, which  
411 are listed in a considerable literature collection presented in the supplements, which we compiled to  
412 our best knowledge and effort (Supp. Table 2).

413 Also, in addition to our data presented so far and taking into account the abstract nature of  
414 experiments with gelatin model setups, we believe that it may be useful and instructive to present  
415 some more quite illustrative if only anecdotal evidence of the drastic effect of and hence danger  
416 posed by blank firing guns of different kinds. Firstly, we fired the Ekol pistol and Skullfire ammunition  
417 at an empty, anatomically realistic skull model made from polyurethane (SYNBONE, Switzerland) that  
418 simulates the mechanical properties of human bone and whose forensic use has been described  
419 elsewhere [28, 15]. Several shots penetrated the skull simulant that had been covered with a double  
420 layer of chamois leather as skin simulant, creating considerable defects in the model (Supp. Fig 15).  
421 We could not reliably reproduce this effect with skull models that were filled with gelatin, still these  
422 findings do correspond to what has been reported from real cases and suggest that shots to the head  
423 with blank guns can be experimentally reconstructed and repeated.

424 Secondly, the massive destructive potential (contact shot) and potential thermal damage (near  
425 distance shot) of blank gun shots is illustrated in Supp. Fig. 16: an uncooked whole chicken (intended  
426 for consumption) was shot at with a blank pistol, applying a contact shot and shot from close  
427 distance. The results demonstrate the potential severe harm to skin and muscle tissue of biological  
428 targets. Thirdly, a further illustration of the energy transfer and damage inflicted by ‘mere’ muzzle  
429 gas is presented in Supp. Fig. 17, where the gas jets produced by blank gun fire are shown to punch  
430 through a several mm wooden board.

431 In addition to these examples and the reports of real cases in Suppl. Table 2, it should be emphasized  
432 that, due to the free and unregulated availability of blank cartridge guns, an unknown proportion –  
433 probably even the majority – of cases involving these weapons are not reported in literature or  
434 included in freely available official statistics. It remains one of the most conspicuous legal  
435 discrepancies of arms regulations and concerns for public health and safety, that access to devices  
436 with time and again proven capacity to inflict potentially deadly harm is scarcely controlled and  
437 regulated at all.

438

## 439 Conclusions

440 Herein, we present the first systematic demonstration that backspatter is reproducibly generated by  
441 shots from different types of blank cartridge guns firing different kinds of ammunition at different  
442 variations of ballistic models doped with a source of biological trace material. Application of  
443 molecular ballistics has been shown to be suitable and is therefore advisable for the analysis of  
444 backspatter trace material that consolidates and persists on outer and inner surfaces of the weapon.

445 Blank guns are intended to mimic the appearance of regular live arms but are constructed in  
446 different manner, with the barrel blockage being the most prominent feature. It obstructs the barrel  
447 in a manner that considerably impedes trace collection and cleaning, but also creates the  
448 opportunity in real crime cases to retrieve minute amounts of trace material even after the weapon  
449 has been cleaned.

450 The severe harming potential of the gas jet from blank ammunition, regardless if nitrocellulose or  
451 black powder, could be confirmed and is in concordance with prior experiments and case reports  
452 involving blank firing guns.

453

454

455

456

457

458

## References

- 460 1. Naghavi M, Marczak LB, Kutz M et al. (2018) Global Mortality From Firearms, 1990-2016. *JAMA*  
461 320(8): 792–814. doi: 10.1001/jama.2018.10060
- 462 2. American Medical Association (2016). AMA calls gun violence "a public health crisis".  
463 <https://www.ama-assn.org/press-center/press-releases/ama-calls-gun-violence-public-health->  
464 crisis
- 465 3. Uzün I, Büyük Y, Erkol Z et al. (2009) Fatalities caused by spherical bullets fired from blank  
466 cartridge guns in Istanbul, Turkey. *J. Forensic Sci.* 54(5): 1127–1130. doi: 10.1111/j.1556-  
467 4029.2009.01097.x
- 468 4. Deutscher Bundestag Drucksache 19/17961
- 469 5. Hamilton FH (1865) A treatise on military surgery and hygiene. Baillière, New York
- 470 6. Shepard GH (1969) Blank cartridge wounds: clinical and experimental studies. *J Trauma*  
471 9(2): 157–166
- 472 7. Tausch D, Sattler W, Wehrfritz K et al. (1974) Tödliche Schussverletzungen mit "unbedenklichen"  
473 Gas- und Schreckschussfaustfeuerwaffen (Mortal injuries after shots with a pistol of gas  
474 (author's transl)). *Z Rechtsmed* 75(1): 71–77. doi: 10.1007/BF02114965
- 475 8. Schyma C, Schyma P (1999) Das Verletzungspotential von Kartuschenmunition im  
476 Gelatinemodell. *Rechtsmedizin* 9(6): 210–214. doi: 10.1007/s001940050112
- 477 9. Pircher R, Große Perdekamp M, Thierauf-Emberger A et al. (2017) Wound morphology in contact  
478 shots from blank cartridge handguns. A study on composite models. *Int J Legal Med*  
479 131(5): 1333–1339. doi: 10.1007/s00414-017-1650-2
- 480 10. Schyma C, Madea B, Courts C (2013) Persistence of biological traces in gun barrels after fatal  
481 contact shots. *Forensic Sci Int Genet* 7(1): 22–27. doi: 10.1016/j.fsigen.2012.05.008
- 482 11. Stephens BG, Allen TB (1983) Back Spatter of Blood from Gunshot Wounds—Observations and  
483 Experimental Simulation. *J. Forensic Sci.* 28(2): 11526J. doi: 10.1520/JFS11526J
- 484 12. Courts C, Madea B, Schyma C (2012) Persistence of biological traces in gun barrels--an approach  
485 to an experimental model. *Int J Legal Med* 126(3): 391–397. doi: 10.1007/s00414-011-0655-5
- 486 13. Brüning A, Wiethold F (1934) Die Untersuchung und Beurteilung von Selbstmörderschußwaffen.  
487 *Dtsch. Z. ges. gerichtl. Med.* 23(S2): 71–82. doi: 10.1007/BF01771912
- 488 14. Courts C, Gahr B, Madea B et al. (2014) Persistence of biological traces at inside parts of a  
489 firearm from a case of multiple familial homicide. *J. Forensic Sci.* 59(4): 1129–1132. doi:  
490 10.1111/1556-4029.12434
- 491 15. Euteneuer J, Gosch A, Cachée P et al. (2020) A distant relationship?—investigation of  
492 correlations between DNA isolated from backspatter traces recovered from firearms, wound  
493 profile characteristics, and shooting distance. *Dtsch. Z. ges. gerichtl. Med.* doi: 10.1007/s00414-  
494 020-02374-1
- 495 16. Schyma C, Lux C, Madea B et al. (2015) The 'triple contrast' method in experimental wound  
496 ballistics and backspatter analysis. *Int J Legal Med* 129(5): 1027–1033. doi: 10.1007/s00414-015-  
497 1151-0
- 498 17. Schyma C, Bauer K, Brüning J (2017) The reference cube. A new ballistic model to generate  
499 staining in firearm barrels. *Forensic Sci Med Pathol* 13(2): 188–195. doi: 10.1007/s12024-017-  
500 9868-3
- 501 18. Laurent A, Mistretta F, Bottiglioli D et al. (2007) Echographic measurement of skin thickness in  
502 adults by high frequency ultrasound to assess the appropriate microneedle length for  
503 intradermal delivery of vaccines. *Vaccine* 25(34): 6423–6430. doi: 10.1016/j.vaccine.2007.05.046

- 504 19. Joodaki H, Panzer MB (2018) Skin mechanical properties and modeling: A review. Proceedings of  
505 the Institution of Mechanical Engineers. Part H, Journal of engineering in medicine 232(4): 323–  
506 343. doi: 10.1177/0954411918759801
- 507 20. Fackler ML, Malinowski JA (1988) Ordnance gelatin for ballistic studies. Detrimental effect of  
508 excess heat used in gelatin preparation. Am J Forensic Med Pathol 9(3): 218–219
- 509 21. Schyma C, Müller R, Brenčičová E et al. (2018) Distortion of the temporary cavity and its  
510 influence on staining in firearm barrels. Forensic Sci Med Pathol. doi: 10.1007/s12024-018-9971-  
511 0
- 512 22. Pang BCM, Cheung BKK (2007) Double swab technique for collecting touched evidence. Leg Med  
513 (Tokyo) 9(4): 181–184. doi: 10.1016/j.legalmed.2006.12.003
- 514 23. Haned H, Slooten K, Gill P (2012) Exploratory data analysis for the interpretation of low template  
515 DNA mixtures. Forensic Sci Int Genet 6(6): 762–774. doi: 10.1016/j.fsigen.2012.08.008
- 516 24. Gill P, Haned H (2013) A new methodological framework to interpret complex DNA profiles using  
517 likelihood ratios. Forensic Sci Int Genet 7(2): 251–263. doi: 10.1016/j.fsigen.2012.11.002
- 518 25. Schyma CWA (2010) Colour contrast in ballistic gelatine. Forensic Sci Int 197(1-3): 114–118. doi:  
519 10.1016/j.forsciint.2010.01.002
- 520 26. Schyma C, Madea B (2012) Evaluation of the temporary cavity in ordnance gelatine. Forensic Sci  
521 Int 214(1-3): 82–87. doi: 10.1016/j.forsciint.2011.07.021
- 522 27. Schyma C, Brünig J, Madea B et al. (2016) Die Endoskopie des Waffenlaufes. Rechtsmedizin  
523 26(3): 224–229. doi: 10.1007/s00194-016-0086-1
- 524 28. Euteneuer J, Gosch A, Cachée P et al. (2019) Evaluation of the backspatter generation and  
525 wound profiles of an anatomically correct skull model for molecular ballistics. Int J Leg Med  
526 28(2): 92. doi: 10.1007/s00414-019-02120-2
- 527 29. Buyuk Y, Cagdir S, Avsar A et al. (2009) Fatal cranial shot by blank cartridge gun. Two suicide  
528 cases. J Forensic Leg Med 16(6): 354–356. doi: 10.1016/j.jflm.2009.01.011
- 529 30. Ankersen J, Birkbeck AE, Thomson RD et al. (1999) Puncture resistance and tensile strength of  
530 skin simulants. Proceedings of the Institution of Mechanical Engineers. Part H, Journal of  
531 engineering in medicine 213(6): 493–501. doi: 10.1243/0954411991535103  
532
